# Supplementary material for: Acute respiratory symptoms and its associated factors among mothers who have under five-years-old children in northwest, Ethiopia
Source: Springer Nature journal article supplement (doi:10.1186/s12199-020-00859-4), 2020-06-15
Supplement: MOESM1 [file 18084304]

## **Information Sheet**

Title: “Acute respiratory symptoms and its associated factors among mothers who have under five-year-old children in northwest, Ethiopia”

Name of principal investigator: - Zewudu Andualem

Name of the organization: - University of Gondar, College of Medicine and Health Sciences, Institute of Public Health.

### **Introduction**

My name is \_\_\_\_\_ and I am a data collector. Right now I am going to give you the relevant information concerning the research and I invite you to be part of this research. Before you decide to be part of the research you can talk anyone to feel comfortable with the research. If there is any word that you do not understand while I am giving the information, please stop me and ask me and I will explain to you. The aim of the project to assess acute respiratory symptoms and its associated factors among mothers who have under five-year-old children in northwest, Ethiopia. There is no risk or direct benefit in participating in this research project. You will not be provided any incentive or payment to take part in this project. Participating and not participation is the full right of participant and they can stop participating in the study at any time. They can also skip any question which they don't want to respond. They can ask any question which is not clear for them. It will take 30 minutes.

Are you voluntary to participate?

Yes (say thank you, continue with her)

No (Say thank you leave her)

Person to contact: - If you have any question you can contact principal investigator at any time

Zewudu Andualem (PI, University of Gondar), Phone +251918570249:

Email: [zewuduandualem12@gmail.com](mailto:zewuduandualem12@gmail.com)

Questionnaire code \_\_\_\_\_ Starting time \_\_\_\_\_

Name of sub city \_\_\_\_\_ House hold number \_\_\_\_\_

Name of data collector \_\_\_\_\_ Sign. \_\_\_\_\_

| Socio - demographic factors mothers who have under five-year-old children |                                                     |                          |                                           |
|---------------------------------------------------------------------------|-----------------------------------------------------|--------------------------|-------------------------------------------|
| 1.                                                                        | Number of people living in the same household _____ |                          |                                           |
| 2.                                                                        | Age of mothers _____ years                          |                          |                                           |
| 3.                                                                        | Religion                                            | 1) Orthodox<br>2) Muslim | 3) Protestant<br>4) Other's specify _____ |
| 4.                                                                        | Marital staus of mothers/gurdians                   | 1. Single<br>2. Married  | 3. Divorced<br>4. Widowed<br>5. Separated |

|                                                                  |                                                                                                         |                                                                                           |
|------------------------------------------------------------------|---------------------------------------------------------------------------------------------------------|-------------------------------------------------------------------------------------------|
| 5.                                                               | Education level of the mother/<br>1. Unable to read and write<br>2. Read and write<br>3. Primary        | 4. Secondary<br>5. Graduate from vocational<br>6. Diploma and above                       |
| 6.                                                               | Education level of the spouse<br>1) Unable to read and write<br>2) Able to read and write<br>3) Primary | 4) Secondary<br>5) Graduate from vocational<br>6) Diploma and above                       |
| 7.                                                               | Average monthly income                                                                                  | _____ETB                                                                                  |
| 8.                                                               | Occupation of mother<br>1) House wife<br>2) Farmer<br>3) Student                                        | 4) Private employee<br>5) Government employee<br>6) Merchant<br>7) Others (specify) _____ |
| 9.                                                               | Occupation of spouse<br>1) Farmer<br>2) Student                                                         | 3) Private employee<br>4) Government employee<br>5) Merchant<br>6) Others (specify) _____ |
| <b>Mothers respiratory symptoms</b>                              |                                                                                                         |                                                                                           |
| <b>Cough</b>                                                     |                                                                                                         |                                                                                           |
| 1.                                                               | Do you usually have a cough?                                                                            | 0. No      1. Yes <b>If "No", go to Q4</b>                                                |
| 2.                                                               | Do you usually cough like this on most days for the last months or more during the year?                | 0. No      1. Yes                                                                         |
| 3.                                                               | For how many days/months/years have you had this cough?                                                 | Number of days/months/years _____                                                         |
| <b>Wheezing</b>                                                  |                                                                                                         |                                                                                           |
| 4.                                                               | Do you usually have wheezing                                                                            | 0. No      1. Yes <b>If "No" go to Q7</b>                                                 |
| 5.                                                               | Mostly do you have wheezing                                                                             | 0. In days      1. In nights                                                              |
| 6.                                                               | Have you ever required medicine or treatment? For the attack(s)?                                        | 0. No      1. Yes                                                                         |
| <b>Breathlessness</b>                                            |                                                                                                         |                                                                                           |
| 7.                                                               | Have your child ever had phlegm                                                                         | 0. No      1. Yes                                                                         |
| 8.                                                               | Have your child ever had pneumonia? Symptoms include fever, cough, tiredness (fatigue), and chest pain. | 0. No      1. Yes                                                                         |
| 9.                                                               | Have you ever had Asthma                                                                                | 0. No      1. Yes                                                                         |
| 10                                                               | Have you ever had Acute Respiratory Infection diagnosis                                                 | 0. No      1. Yes                                                                         |
| 11                                                               |                                                                                                         |                                                                                           |
| 12                                                               | Has your child ever had tonsillectomy                                                                   | 0. No      1. Yes                                                                         |
| 13                                                               | Has your child ever had <b>hay fever</b>                                                                | 0. No      1. Yes                                                                         |
| 14                                                               | Has your child ever had eczema?                                                                         | 0. No      1. Yes                                                                         |
| 15                                                               | Has had or ever had tuberculosis?                                                                       | 0. No      1. Yes                                                                         |
| 16                                                               | Have you ever had troubled by shortness of breath?                                                      | 0. No      1. Yes                                                                         |
| <b>Grade 0: No breathlessness except with strenuous exercise</b> |                                                                                                         |                                                                                           |

|                                                                                                                                                                                                         |                                                                                                  |                                         |                                         |
|---------------------------------------------------------------------------------------------------------------------------------------------------------------------------------------------------------|--------------------------------------------------------------------------------------------------|-----------------------------------------|-----------------------------------------|
| <b>Grade 1: Breathlessness when hurrying on the level ground or walking up a slight hill at least one months in a year</b>                                                                              |                                                                                                  |                                         |                                         |
| <b>Grade 2: Walking slower than people of the same age on the same level because of breathlessness or need to stop for breath when walking at their own pace or level at least one months in a year</b> |                                                                                                  |                                         |                                         |
| <b>Grade 3: Stopping for breath after walking about a certain distance or a few minutes on the level ground at least one months in a year</b>                                                           |                                                                                                  |                                         |                                         |
| <b>Grade 4: Being too breathless to leave the house or breathless when dressing or undressing at least one months in a year</b>                                                                         |                                                                                                  |                                         |                                         |
| 17                                                                                                                                                                                                      | Have your child ever had chest tightness                                                         | 0. No<br>1. Yes                         | 1. Yes                                  |
| 18                                                                                                                                                                                                      | Have your child ever had bronchitis                                                              | 0. No<br>1. Yes                         | 1. Yes                                  |
| 19                                                                                                                                                                                                      | Have your child ever had Emphysema                                                               | 0. No<br>1. Yes                         | 1. Yes                                  |
| Occupational history                                                                                                                                                                                    |                                                                                                  |                                         |                                         |
| 20                                                                                                                                                                                                      | Have you worked in the last 5 years in any poor indoor or outdoor (dusty or smelly) environment? | 0. No<br>1. Yes                         | 1. Yes<br>If yes , please specify _____ |
| Tobacco smoking                                                                                                                                                                                         |                                                                                                  |                                         |                                         |
| 21                                                                                                                                                                                                      | Does any member of this household smoke?                                                         | 0. No<br>1. Yes                         | <b>If “No” go to 23</b>                 |
| 22                                                                                                                                                                                                      | What types of tobacco do you smoke?                                                              |                                         |                                         |
|                                                                                                                                                                                                         | Cigarettes                                                                                       | 0. No<br>1. Yes                         |                                         |
|                                                                                                                                                                                                         | Cigars (local)                                                                                   | 0. No<br>1. Yes                         |                                         |
| 23                                                                                                                                                                                                      | Do they usually smoke indoors?                                                                   | 0. No<br>1. Yes                         |                                         |
| Mothers family health history                                                                                                                                                                           |                                                                                                  |                                         |                                         |
| 24                                                                                                                                                                                                      | Mother                                                                                           |                                         |                                         |
|                                                                                                                                                                                                         | Does have lung cancer?                                                                           | 0. No<br>1. Yes                         | 2. Don't know                           |
|                                                                                                                                                                                                         | Chronic bronchitis?                                                                              | 0. No<br>1. Yes                         | 2. Don't know                           |
|                                                                                                                                                                                                         | Emphysema?                                                                                       | 0.No<br>1. Yes                          | 2. Don't know                           |
|                                                                                                                                                                                                         | Asthma?                                                                                          | 0.No<br>1. Yes                          | 2. Don't know                           |
| 25                                                                                                                                                                                                      | Father                                                                                           |                                         |                                         |
|                                                                                                                                                                                                         | Does have lung cancer?                                                                           | 0.No<br>1. Yes                          | 2. Don't know                           |
|                                                                                                                                                                                                         | Chronic bronchitis?                                                                              | 0. No<br>1. Yes                         | 2. Don't know                           |
|                                                                                                                                                                                                         | Emphysema?                                                                                       | 0. No<br>1. Yes                         | 2. Don't know                           |
|                                                                                                                                                                                                         | Asthma?                                                                                          | 0. No<br>1. Yes                         | 2. Don't know                           |
| <b>Potential associated factors with respiratory symptom</b>                                                                                                                                            |                                                                                                  |                                         |                                         |
| <b>I. Indoor air pollution</b>                                                                                                                                                                          |                                                                                                  |                                         |                                         |
| 1.                                                                                                                                                                                                      | In your house, what fuel is usually used for cooking?                                            | 1. Charcoal<br>2. Electricity<br>3. Gas | 4. Open fires<br>5. Other _____         |
| 2.                                                                                                                                                                                                      | In your house, what fuel is usually used for heating                                             | 1. None                                 | 4. Gas, kerosene, paraffin              |

|    |                                                                                                                                                                                                    |                                      |                                                      |
|----|----------------------------------------------------------------------------------------------------------------------------------------------------------------------------------------------------|--------------------------------------|------------------------------------------------------|
|    |                                                                                                                                                                                                    | 2. Wood, coal, oil<br>3. Electricity | 5. Other – Please specify _____                      |
| 3. | Has this child's Mother had regular (at least once a week) contact with farm animals (e.g. cattle, pigs, goats, sheep or poultry) while being pregnant with this child? <b>0. No</b> <b>1. Yes</b> |                                      |                                                      |
| 4. | Does child mother (or female guardian) smoke cigarettes?<br>0. No                      1. Yes                                                                                                      |                                      | If YES, how many cigarettes smoke each day?<br>_____ |
| 5. | Does child's father (or male guardian) smoke cigarettes?<br>0. No                      1. Yes                                                                                                      |                                      | If YES, how many cigarettes smoke each day?<br>_____ |
| 6. | How many people living in the house smoke cigarettes _____ people including parents?                                                                                                               |                                      |                                                      |
| 7. | Is there Cockroach infestation in household                                                                                                                                                        | 0. No                                | 1. Yes                                               |
| 8. | Has the building ever had a fire?                                                                                                                                                                  | 0. No                                | 1. Yes    When _____                                 |
| 9. | Is there smoking in the building?                                                                                                                                                                  | 0. No                                | 1. Yes    How frequently? _____                      |
| 10 | Has painting/staining been done in the last 6 months HH?                                                                                                                                           | 0. No                                | 1. Yes                                               |
| 11 | Is there new carpet, drapes or other textiles in the last 6 months?                                                                                                                                | 0. No                                | 1. Yes                                               |
| 12 | Have air fresheners been used recently in the last one weeks?                                                                                                                                      | 0. No                                | 1. Yes                                               |
| 13 | Is there a kitchen exhaust fan                                                                                                                                                                     | 0. No                                | 1. Yes                                               |
| 14 | Is there a clothes dryer?                                                                                                                                                                          | 0. No                                | 1. Yes                                               |
| 15 | Has there been a pesticide application?                                                                                                                                                            | 0. No                                | 1. Yes                                               |

**Checklist: Household characteristics**

|                                                             |                                                         |                     |                                                      |                           |
|-------------------------------------------------------------|---------------------------------------------------------|---------------------|------------------------------------------------------|---------------------------|
| S.No                                                        | Variable                                                |                     |                                                      |                           |
| 1)                                                          | Age of buildings _____                                  | 7)                  | Cleaning frequency house _____                       | per day/week              |
| 2)                                                          | No of beds per HH _____                                 | 8)                  | No functional windows HH _____                       |                           |
| 3)                                                          | Floor area (m <sup>2</sup> ) _____                      |                     | Density of occupant (m <sup>3</sup> /occupant) _____ |                           |
| 4)                                                          | How many rooms are there in your home _____             |                     |                                                      |                           |
| Questions 5 to 14 interviewer should be observe and measure |                                                         |                     |                                                      |                           |
| 9)                                                          | Floor construction materials (multiple answer possible) | 0. Wooden<br>1. Mud | 2. Concrete<br>3. Brick                              | 4. Others (Specify) _____ |
| 10)                                                         | Wall surface Water based paint                          | 0. No               |                                                      | 1. Yes                    |
| 11)                                                         | Ceiling surface                                         | 0. Wooden           |                                                      | 1. Painted                |
| 12)                                                         | Damp stains                                             | 0. No               |                                                      | 1. Yes                    |
| 13)                                                         | Visible mould                                           | 0. No               |                                                      | 1. Yes                    |
| 14)                                                         | Where is normal cooking done?                           | 1. Inside           |                                                      | 2. Outside                |
| 15)                                                         | What type of material is the kitchen floor made from?   | 1. Clay & mud       | 2. Cement                                            | 3. Other (specify) _____  |

|                              |                                                                                       |                                                                                     |                                                             |                        |
|------------------------------|---------------------------------------------------------------------------------------|-------------------------------------------------------------------------------------|-------------------------------------------------------------|------------------------|
| 16)                          | What type of roof (material of construction?) does the kitchen level?                 | 1. Thatch<br>2. Iron sheets                                                         | 3. Asbestos                                                 | 4. Other specify _____ |
| 17)                          | What type of wall (material of construction) is the kitchen made of?                  | 1. Thatch<br>2. Wood                                                                | 3. Mud & wood<br>4. Stone or brick                          | 5. Other specify _____ |
| 18)                          | Number of windows in the room in which cooking takes place _____                      |                                                                                     |                                                             |                        |
| 19)                          | Do you normally open doors during cooking?                                            |                                                                                     |                                                             | 0. No<br>1. Yes        |
| 20)                          | Do you normally open windows during cooking? (assess good or bad ventilation)         |                                                                                     |                                                             | 0. No<br>1. Yes        |
| 21)                          | Is there any poor outdoor air influence during cooking?                               |                                                                                     |                                                             | 0. No<br>1. Yes        |
| 22)                          | How many people are normally present in the kitchen when cooking is being done? _____ |                                                                                     |                                                             |                        |
| 23)                          | Who is normally present during cooking times in the kitchen?                          | 1. Mother<br>2. Mother & children less than 5yrs                                    | 3. Mother & children<br>4. Whole families<br>5. Other _____ |                        |
| 24)                          | What type of stove is used for cooking (in terms of combustion chamber)?              | 1. Open combustion<br>2. Partly open combustion<br>3. Enclosed chamber with no flue | 4. Enclosed chamber with a flue<br>5. Other Specify _____   |                        |
| 25)                          | How much time on average does cooking take per day? _____ (hrs.)                      |                                                                                     |                                                             |                        |
| 26)                          | How much time do you spend indoors on an average day? _____ (hrs.)                    |                                                                                     |                                                             |                        |
| <b>Outdoor air pollution</b> |                                                                                       |                                                                                     |                                                             |                        |
| 27)                          | Is there an attached garage Living less than 100 m house hold?                        |                                                                                     |                                                             | 0. No<br>1. Yes        |
| 28)                          | How often do trucks pass through the street where you live, on weekdays?              | 1. Never<br>2. Seldom                                                               | 3. Frequently through the day<br>4. Almost the whole day    |                        |
| 29)                          | Living less than 100 m Heavy traffic                                                  | 0. No                                                                               | 1. Yes                                                      |                        |
| 30)                          | Living less than 100 m chimneys                                                       | 1. No                                                                               | 2. Yes                                                      |                        |
| 31)                          | Living less than 100 m recycling warehouses                                           | 0. No                                                                               | 1. Yes                                                      |                        |
| 32)                          | Living less than 100 m (Unpaved roads/streets)                                        | 0. No                                                                               | 1. Yes                                                      |                        |
| 33)                          | Exposure to animal allergens in early childhood (regarding child)                     |                                                                                     |                                                             | 0. No<br>1. Yes        |
| 34)                          | Exposure to animal allergens in present time                                          |                                                                                     |                                                             | 0. No<br>1. Yes        |

*“Thank you for your participation”*
