# Supplementary material for: Acute respiratory symptoms and its associated factors among mothers who have under five-years-old children in northwest, Ethiopia
Source: Springer Nature journal article supplement (doi:10.1186/s12199-020-00859-4), 2020-06-15
Supplement: MOESM3 [file 18084304]

| Variable      | VIF         | 1/VIF           |
|---------------|-------------|-----------------|
| N7Educationi  | <b>1.23</b> | <b>0.811333</b> |
| 1.N19Haveyi   | <b>1.08</b> | <b>0.926103</b> |
| N1Inyourhows  |             |                 |
| 2             | <b>1.38</b> | <b>0.723314</b> |
| 3             | <b>1.08</b> | <b>0.926044</b> |
| 4             | <b>1.15</b> | <b>0.872550</b> |
| N2Inyourhows  |             |                 |
| 2             | <b>1.19</b> | <b>0.841494</b> |
| 3             | <b>1.08</b> | <b>0.926458</b> |
| 1.N3Hasthi~a  | <b>1.12</b> | <b>0.893808</b> |
| 1.N10Haspan~n | <b>1.52</b> | <b>0.657504</b> |
| 1.N11Isthe~r  | <b>1.47</b> | <b>0.678806</b> |
| 1.N15Hasth~a  | <b>1.11</b> | <b>0.903410</b> |
| 1.N11Walls~t  | <b>1.38</b> | <b>0.725771</b> |
| 1.N13_Damp~s  | <b>1.17</b> | <b>0.851742</b> |
| 1.N21Doyou~n  | <b>1.31</b> | <b>0.764906</b> |
| 1.N28Isthe~g  | <b>1.10</b> | <b>0.906051</b> |
| N29Howofte~h  |             |                 |
| 1             | <b>1.43</b> | <b>0.700877</b> |
| 2             | <b>1.37</b> | <b>0.728007</b> |
| 3             | <b>1.46</b> | <b>0.682947</b> |
| 1.N30Livin~i  | <b>1.48</b> | <b>0.673459</b> |
| 1.N33Livin~d  | <b>1.24</b> | <b>0.807360</b> |
| 1.N34Expos~a  | <b>1.82</b> | <b>0.548294</b> |
| 1.N35Expos~r  | <b>1.86</b> | <b>0.536682</b> |
| Mean VIF      | <b>1.32</b> |                 |
